# Supplementary material for: Cytochrome P450 metabolism studies of [6]-gingerol, [8]-gingerol, and [10]-gingerol by liver microsomes of humans and different species combined with expressed CYP enzymes
Source: Royal Society of Chemistry journal article supplement (doi:10.1039/d2ra06184h), 2023-01-01
Supplement: d2ra06184h1.pdf [file d2ra06184h1.pdf]

**Cytochromes P450 metabolism studies of [6]-gingerol, [8]-gingerol, and [10]-gingerol by liver microsomes of human and different species of tissue combined with expressed CYP enzymes.**

Chanjuan Chen,<sup>†a</sup> Xintong Chen,<sup>†a</sup> Qingmei Mo,<sup>a</sup> Jie Liu,<sup>b</sup> Xinsheng Yao,<sup>a</sup> Xin Di,<sup>b</sup> Zifei Qin,<sup>\*c</sup> Liangliang He,<sup>\*a</sup> and Zhihong Yao<sup>\*ad</sup>

<sup>a</sup>International Cooperative Laboratory of Traditional Chinese Medicine Modernization and Innovative Drug Development of Ministry of Education (MOE) of China / Guangdong Province Key Laboratory of Pharmacodynamic Constituents of TCM and New Drugs Research / Institute of Traditional Chinese Medicine & Natural Products, College of Pharmacy, Jinan University, Guangzhou 510632, China

<sup>b</sup>School of Pharmacy, Shenyang Pharmaceutical University, 103 Wenhua Road, Shenyang 110016, China

<sup>c</sup>Department of Pharmacy, the First Affiliated Hospital of Zhengzhou University, Zhengzhou 450052, P. R. China

<sup>d</sup>Guangzhou Key Laboratory of Formula-Pattern of Traditional Chinese Medicine, Jinan University, Guangzhou 510632, P. R. China

<sup>†</sup>These authors contributed equally to this work.

\*Correspondence authors:

Prof. Zhihong Yao, E-mail: [yaozhihong\\_jnu@163.com](mailto:yaozhihong_jnu@163.com);

Dr. Liangliang He, E-mail: [heliangliang5878 @163.com](mailto:heliangliang5878@163.com);

Dr. Zifei Qin, E-mail: [qzf1989@163.com](mailto:qzf1989@163.com);

## Single Mass Analysis

Tolerance = 5.0 PPM / DBE: min = -1.5, max = 50.0

Element prediction: Off

Number of isotope peaks used for i-FIT = 3

Monoisotopic Mass, Even Electron Ions

107 formula(e) evaluated with 1 results within limits (up to 50 closest results for each mass)

Elements Used:

C: 0-100 H: 0-100 O: 0-50 Na: 0-1

2L3A-(2L6G)

2017110631 197 (1.597)

1: TOF MS ES+  
1.31e+005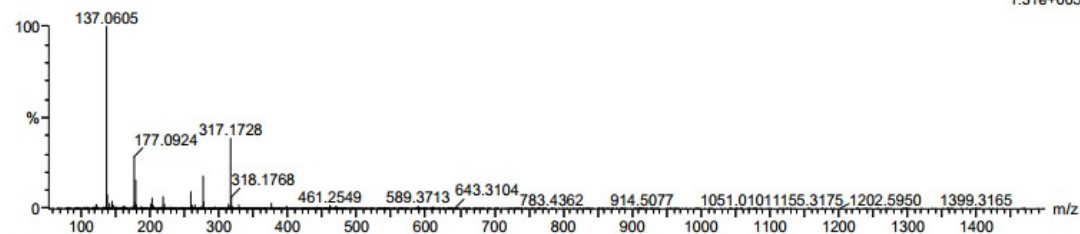Minimum: -1.5  
Maximum: 5.0 5.0 50.0

| Mass     | Calc. Mass | mDa  | PPM  | DBE | i-FIT | Norm | Conf (%) | Formula       |
|----------|------------|------|------|-----|-------|------|----------|---------------|
| 317.1728 | 317.1729   | -0.1 | -0.3 | 4.5 | 145.1 | n/a  | n/a      | C17 H26 O4 Na |

Figure S1-1.

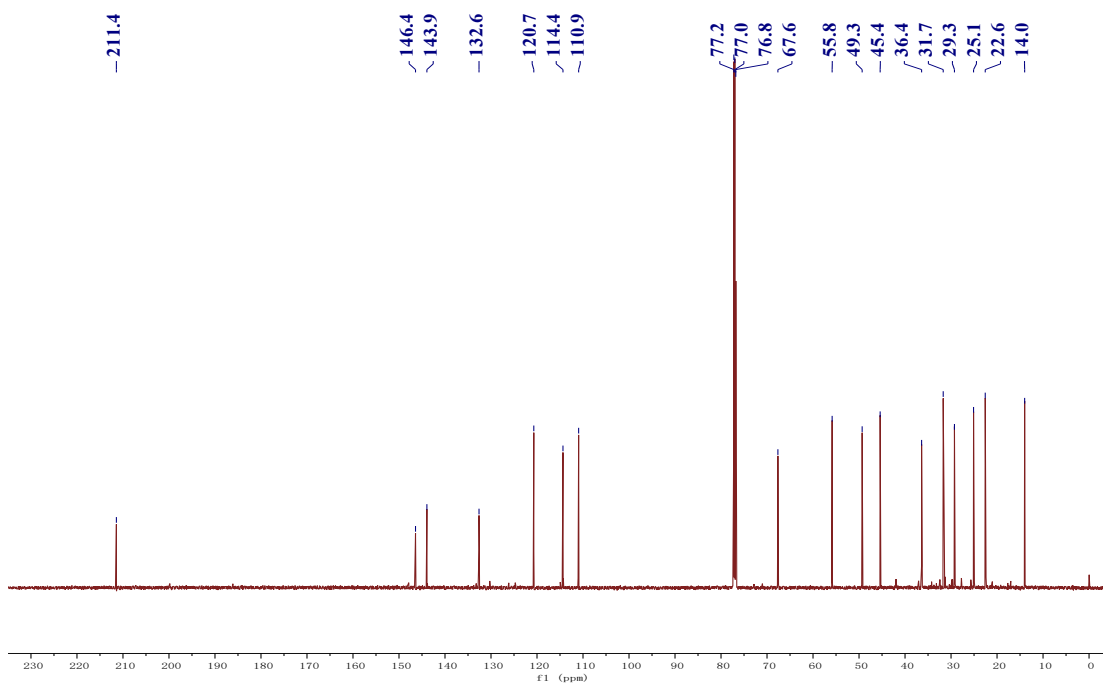

Figure S1-2.

**Figure S1.** The HRESIMS spectrum (S1-1) and <sup>13</sup>C-NMR spectrum (S1-2) of reference standard of [6]-gingerol.

## Single Mass Analysis

Tolerance = 10.0 PPM / DBE: min = -1.5, max = 50.0

Element prediction: Off

Number of isotope peaks used for i-FIT = 3

Monoisotopic Mass, Even Electron Ions

52 formula(e) evaluated with 1 results within limits (all results (up to 1000) for each mass)

Elements Used:

C: 0-60 H: 0-100 O: 0-30

ZO209F2

20190610005 194 (1.563)

1: TOF MS ES+  
2.02e+005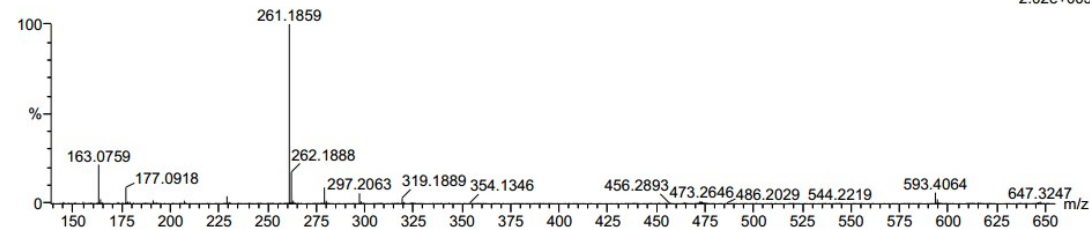Minimum: -1.5  
Maximum: 50.0

| Mass     | Calc. Mass | mDa  | PPM  | DBE | i-FIT | Conf (%) | Formula    |
|----------|------------|------|------|-----|-------|----------|------------|
| 297.2063 | 297.2066   | -0.3 | -1.0 | 3.5 | 124.4 | n/a      | C17 H29 O4 |

Figure S2-1.

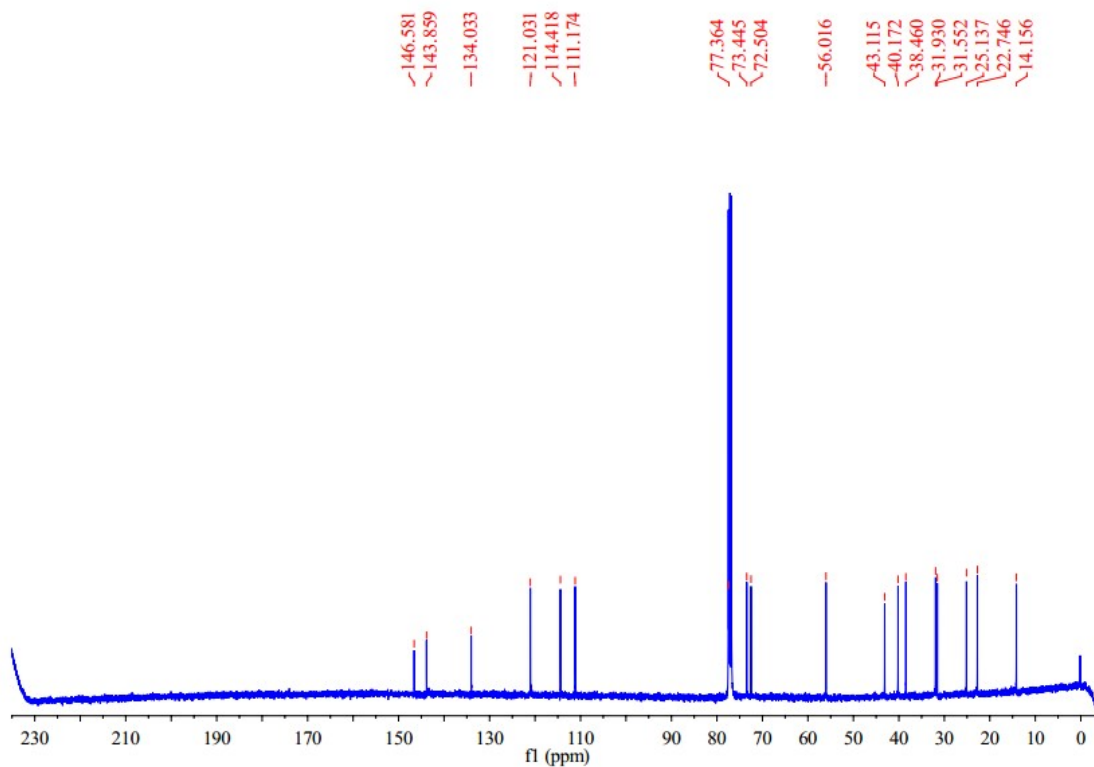

Figure S2-2.

Figure S2. The HRESIMS spectrum (S2-1) and <sup>13</sup>C-NMR spectrum (S2-2) of reference standard of (3R,5S)-[6]-gingerdiol.

## Single Mass Analysis

Tolerance = 10.0 PPM / DBE: min = -1.5, max = 50.0

Element prediction: Off

Number of isotope peaks used for i-FIT = 3

Monoisotopic Mass, Even Electron Ions

52 formula(e) evaluated with 1 results within limits (all results (up to 1000) for each mass)

Elements Used:

C: 0-60 H: 0-100 O: 0-30

ZO2Q8B

20190610014 189 (1.526)

1: TOF MS ES+  
6.56e+005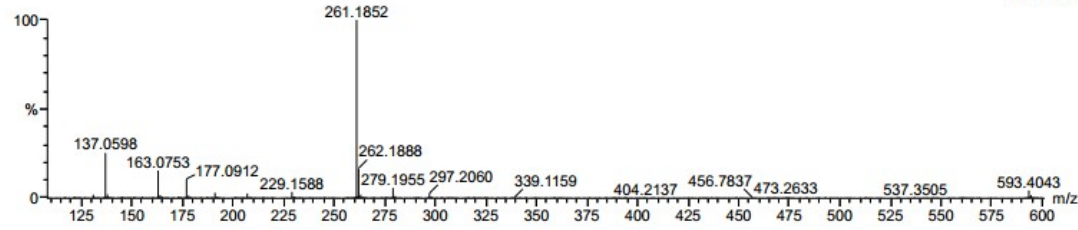

| Mass     | Calc. Mass | mDa  | PPM  | DBE | i-FIT | Conf (%) | Formula    |
|----------|------------|------|------|-----|-------|----------|------------|
| 297.2060 | 297.2066   | -0.6 | -2.0 | 3.5 | 153.4 | n/a      | C17 H29 O4 |

Figure S3-1.

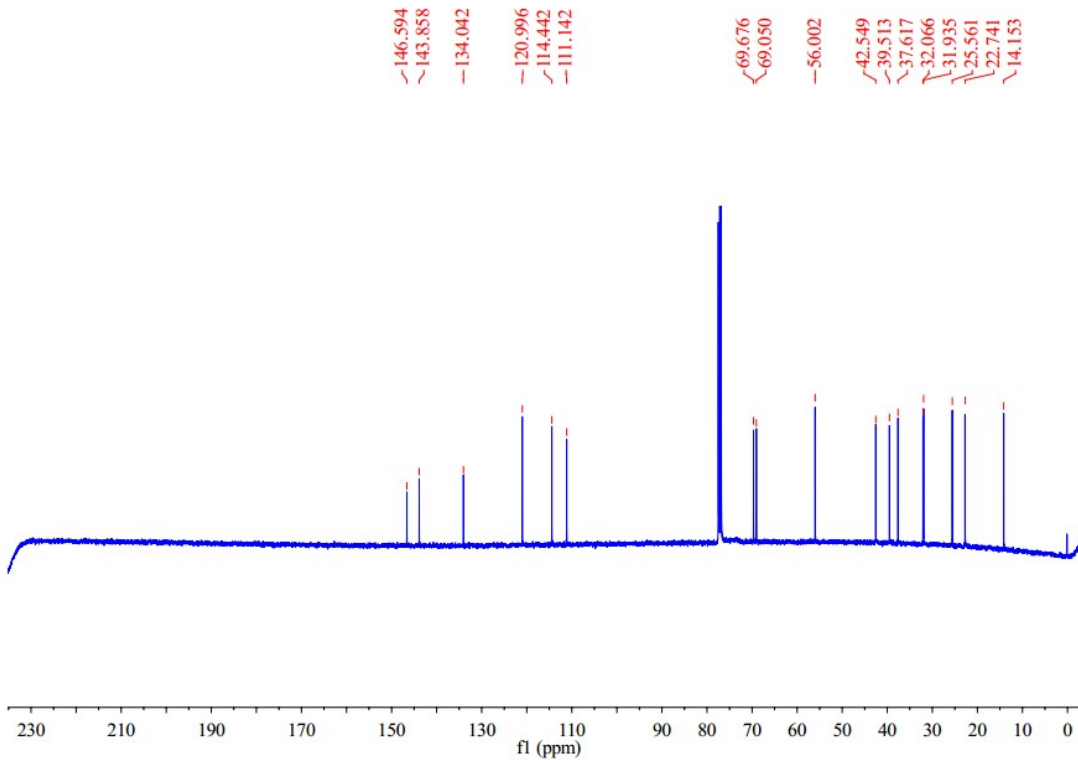

Figure S3-2.

**Figure S3.** The HRESIMS spectrum (S3-1) and  $^{13}\text{C}$ -NMR spectrum (S3-2) of reference standard of (3S,5S)-[6]-gingerdiol.

## Single Mass Analysis

Tolerance = 10.0 PPM / DBE: min = -1.5, max = 50.0

Element prediction: Off

Number of isotope peaks used for i-FIT = 3

Monoisotopic Mass, Even Electron Ions

64 formula(e) evaluated with 1 results within limits (up to 50 closest results for each mass)

Elements Used:

C: 0-100 H: 0-100 O: 0-50

2L7C

2017110629 217 (1.758)

1: TOF MS ES+  
6.11e+004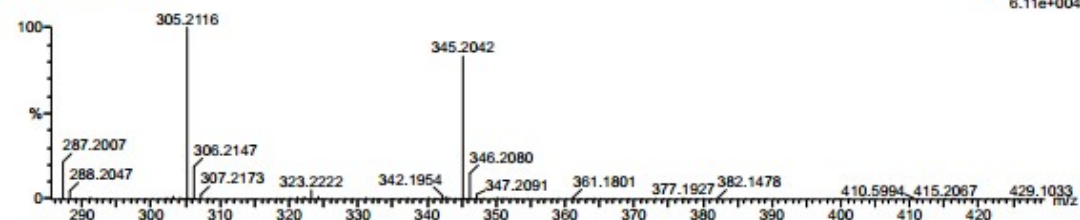

| Mass     | Calc. Mass | mba | PPM | DBE | i-FIT | Norm | Conf (%) | Formula    |
|----------|------------|-----|-----|-----|-------|------|----------|------------|
| 323.2222 | 323.2222   | 0.0 | 0.0 | 4.5 | 58.6  | n/a  | n/a      | C19 H31 O4 |

Figure S4-1.

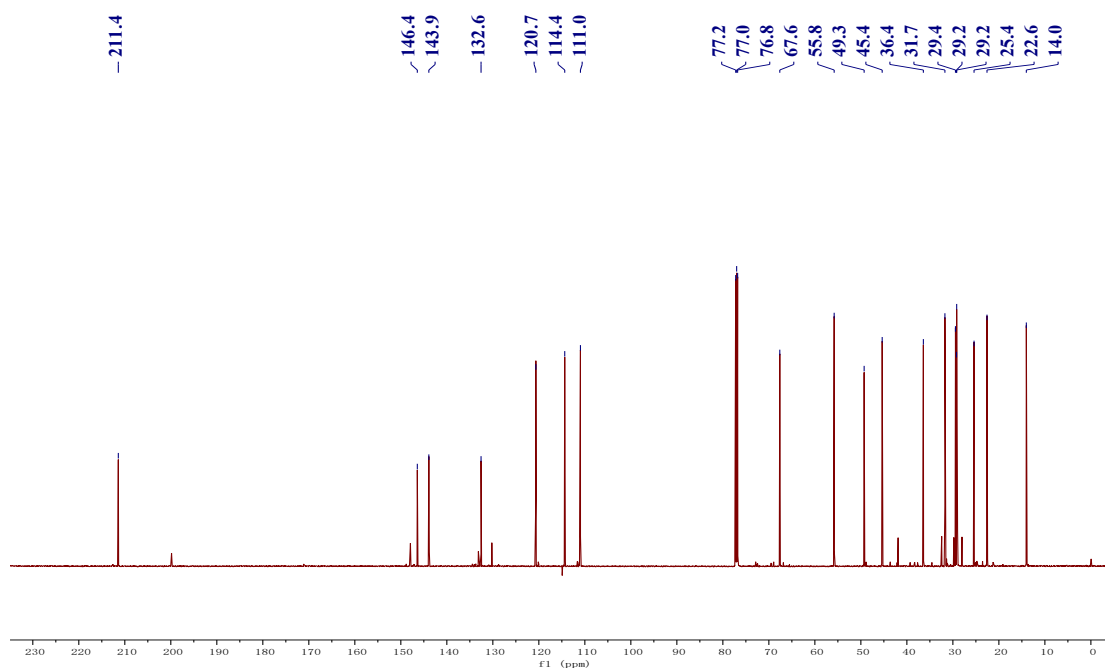

Figure S4-2.

Figure S4. The HRESIMS spectrum (S4-1) and  $^{13}\text{C}$ -NMR spectrum (S4-2) of reference standard of [8]-gingerol.

(3R,5S)-[8]-gingerdiol

Single Mass Analysis

Tolerance = 10.0 PPM / DBE: min = -1.5, max = 50.0

Element prediction: Off

Number of isotope peaks used for i-FIT = 3

Monoisotopic Mass, Even Electron Ions

133 formula(e) evaluated with 2 results within limits (up to 50 best isotopic matches for each mass)

Elements Used:

C: 0-500 H: 0-1000 O: 0-200 Na: 0-1

70%M-GINGER

20170118\_3 1817 (14.552)

1: TOF MS ES+  
1.56e+005

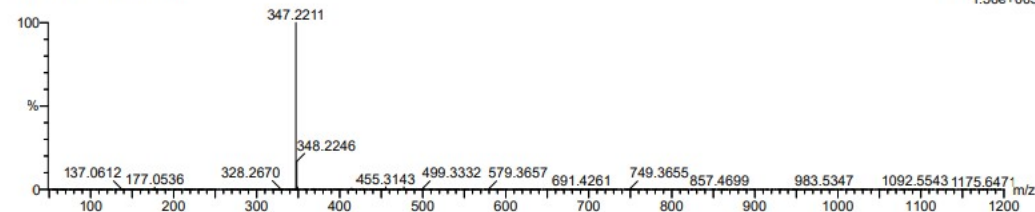

Minimum: 5.0 10.0 -1.5  
Maximum: 50.0

| Mass     | Calc. Mass | mDa  | PPM  | DBE | i-FIT | Norm  | Conf (%) | Formula       |
|----------|------------|------|------|-----|-------|-------|----------|---------------|
| 347.2211 | 347.2198   | 1.3  | 3.7  | 3.5 | 130.5 | 0.426 | 65.29    | C19 H32 O4 Na |
|          | 347.2222   | -1.1 | -3.2 | 6.5 | 131.1 | 1.058 | 34.71    | C21 H31 O4    |

Figure S5-1.

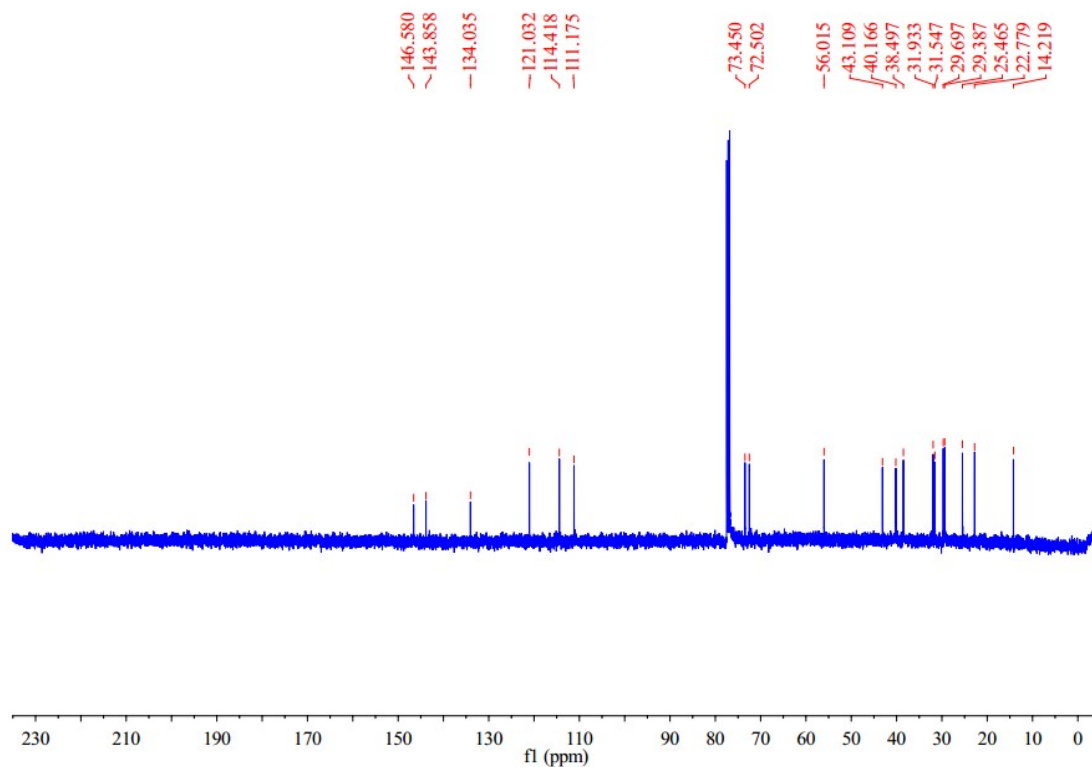

Figure S5-2.

Figure S5. The HRESIMS spectrum (S5-1) and <sup>13</sup>C-NMR spectrum (S5-2) of reference standard of (3R,5S)-[8]-gingerdiol.

Single Mass Analysis

Tolerance = 10.0 PPM / DBE: min = -1.5, max = 50.0

Element prediction: Off

Number of isotope peaks used for i-FIT = 3

Monoisotopic Mass, Even Electron Ions

133 formula(e) evaluated with 2 results within limits (up to 50 best isotopic matches for each mass)

Elements Used:

C: 0-500 H: 0-1000 O: 0-200 Na: 0-1

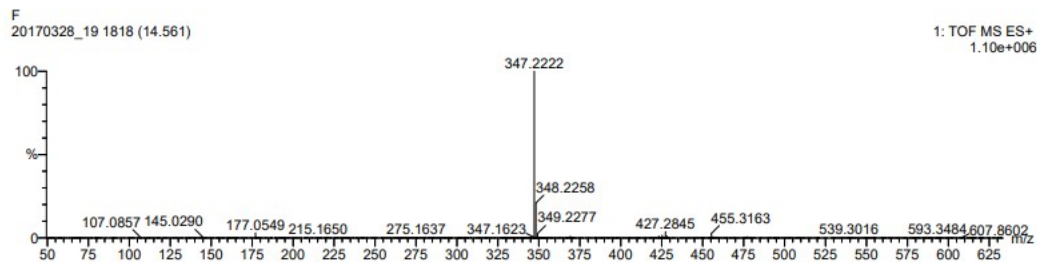

| Mass     | Calc. Mass | mDa | PPM | DBE | i-FIT | Norm  | Conf (%) | Formula       |
|----------|------------|-----|-----|-----|-------|-------|----------|---------------|
| 347.2222 | 347.2198   | 2.4 | 6.9 | 3.5 | 603.9 | 0.052 | 94.93    | C19 H32 O4 Na |
|          | 347.2222   | 0.0 | 0.0 | 6.5 | 606.8 | 2.981 | 5.07     | C21 H31 O4    |

Figure S6-1.

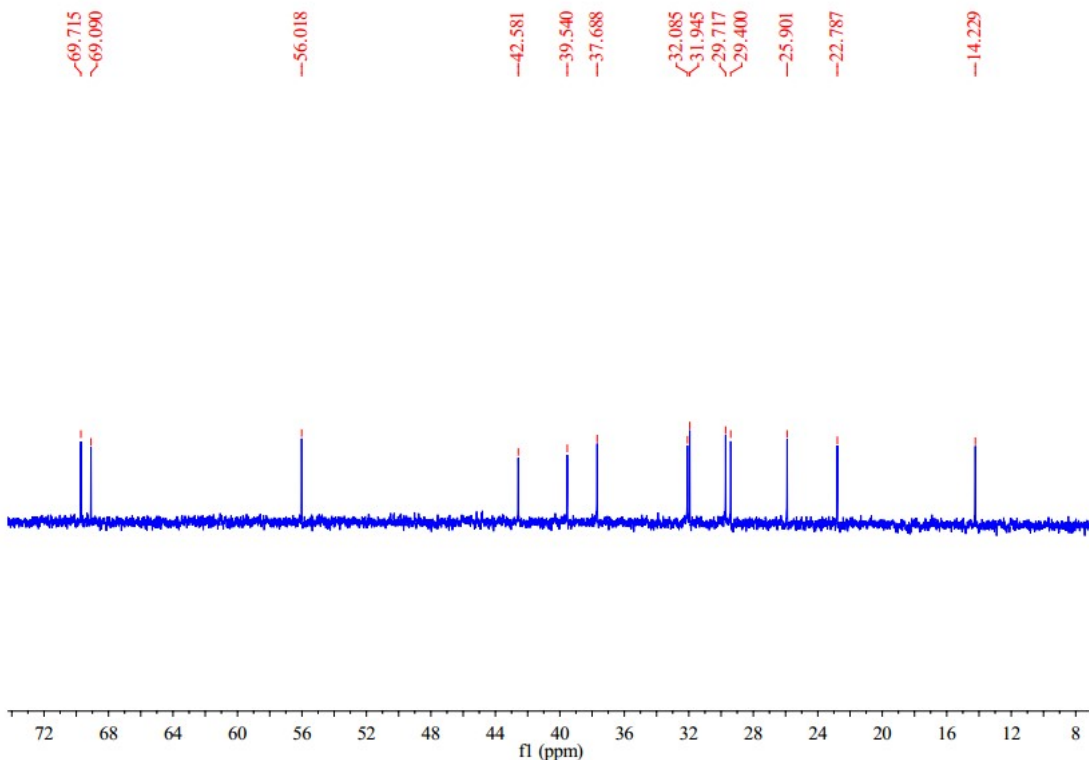

Figure S6-2.

Figure S6. The HRESIMS spectrum (S6-1) and <sup>13</sup>C-NMR spectrum (S6-2) of reference standard of (3S,5S)-[8]-gingerdiol.

Single Mass Analysis

Tolerance = 5.0 PPM / DBE: min = -1.5, max = 100.0

Element prediction: Off

Number of isotope peaks used for i-FIT = 2

Monoisotopic Mass, Even Electron Ions

142 formula(e) evaluated with 1 results within limits (all results (up to 1000) for each mass)

Elements Used:

C: 0-60 H: 0-100 O: 0-50 23Na: 0-1

ZL13

20171017-8 251 (2.023) Cm (248:256)

1: TOF MS ES+  
5.13e+005

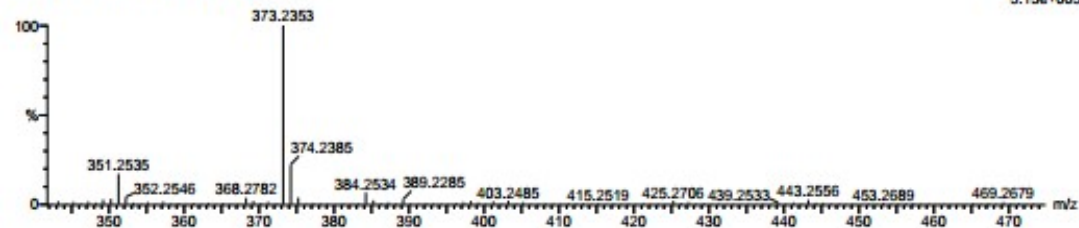

Minimum: -1.5  
Maximum: 10.0 5.0 100.0

| Mass     | Calc. Mass | mDa  | PPM  | DBE | i-FIT | Norm | Conf (%) | Formula         |
|----------|------------|------|------|-----|-------|------|----------|-----------------|
| 373.2353 | 373.2355   | -0.2 | -0.5 | 4.5 | 15.3  | n/a  | n/a      | C21 H34 O4 23Na |

Figure S7-1.

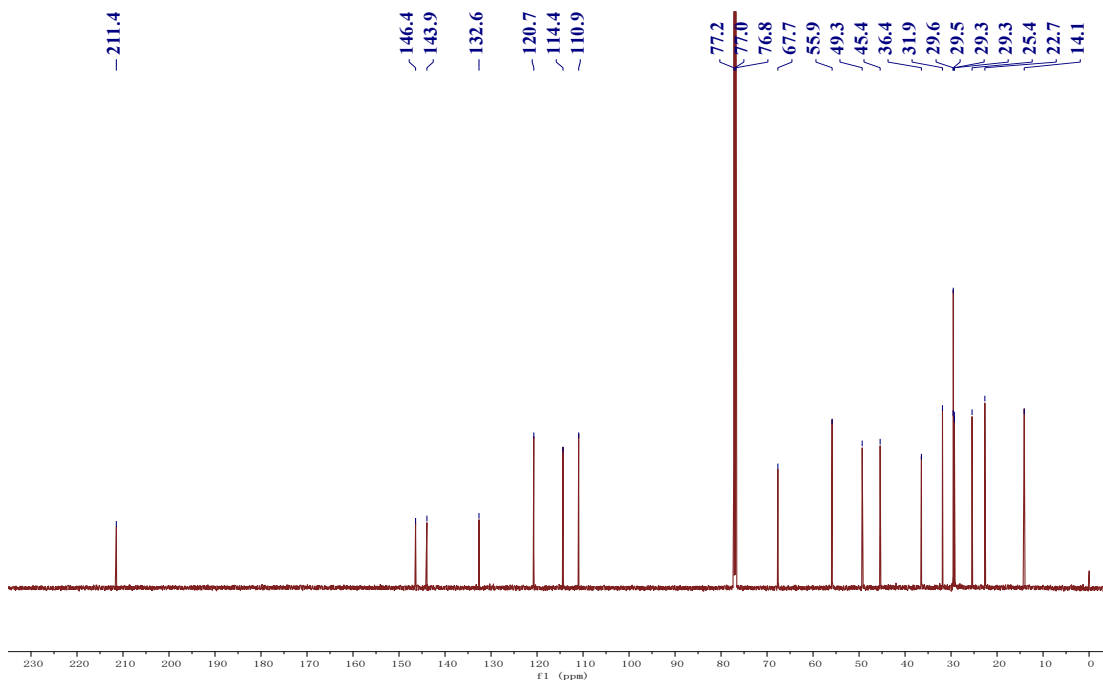

Figure S7-2.

Figure S7. The HRESIMS spectrum (S7-1) and <sup>13</sup>C-NMR spectrum (S7-2) of reference standard of [10]-gingerol.



## Single Mass Analysis

Tolerance = 10.0 PPM / DBE: min = -1.5, max = 50.0

Element prediction: Off

Number of isotope peaks used for i-FIT = 3

Monoisotopic Mass, Even Electron Ions

68 formula(e) evaluated with 1 results within limits (all results (up to 1000) for each mass)

Elements Used:

C: 0-80 H: 0-100 O: 0-20

Z02Q16D

20190715-6 259 (2.094)

1: TOF MS ES+  
3.49e+005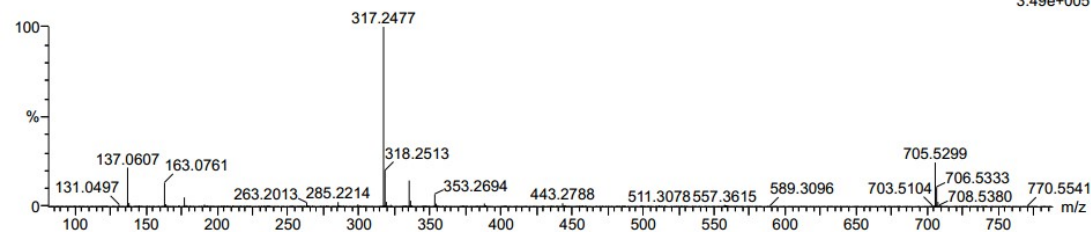Minimum: -1.5  
Maximum: 10.0 10.0 50.0

| Mass     | Calc. Mass | mDa | PPM | DBE | i-FIT | Conf (%) | Formula    |
|----------|------------|-----|-----|-----|-------|----------|------------|
| 353.2694 | 353.2692   | 0.2 | 0.6 | 3.5 | 159.7 | n/a      | C21 H37 O4 |

Figure S8-1.

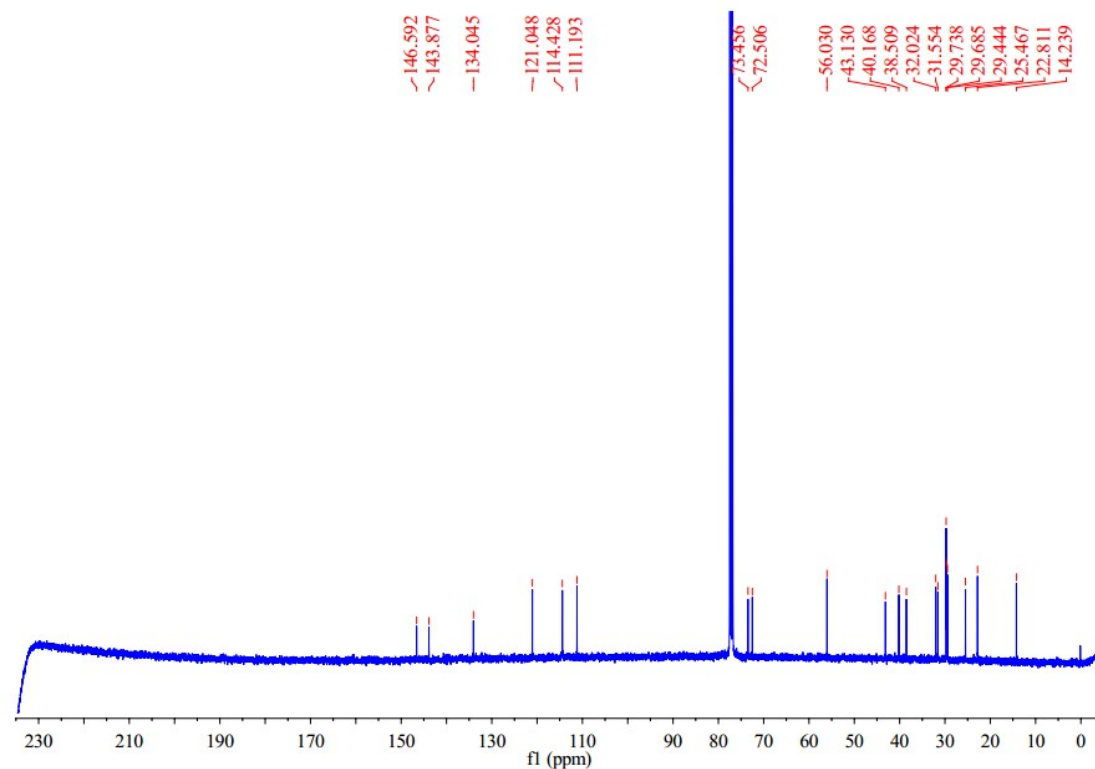

Figure S8-2.

Figure S8. The HRESIMS spectrum (S8-1) and <sup>13</sup>C-NMR spectrum (S8-2) of reference standard of (3R,5S)-[10]-gingerdiol.

Single Mass Analysis

Tolerance = 10.0 PPM / DBE: min = -1.5, max = 50.0

Element prediction: Off

Number of isotope peaks used for i-FIT = 3

Monoisotopic Mass, Even Electron Ions

68 formula(e) evaluated with 1 results within limits (all results (up to 1000) for each mass)

Elements Used:

C: 0-80 H: 0-100 O: 0-20

Z02Q16C

2019070103 256 (2.061)

1: TOF MS ES+  
4.89e+005

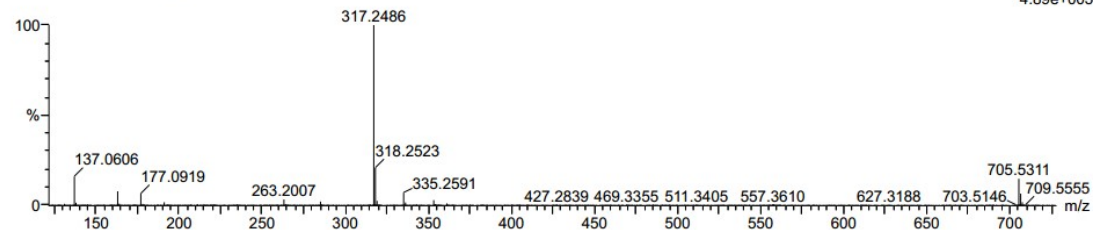

Minimum: -1.5  
Maximum: 10.0 10.0 50.0

| Mass     | Calc. Mass | mDa  | PPM  | DBE | i-FIT | Conf (%) | Formula    |
|----------|------------|------|------|-----|-------|----------|------------|
| 353.2687 | 353.2692   | -0.5 | -1.4 | 3.5 | 97.1  | n/a      | C21 H37 O4 |

Figure S9-1.

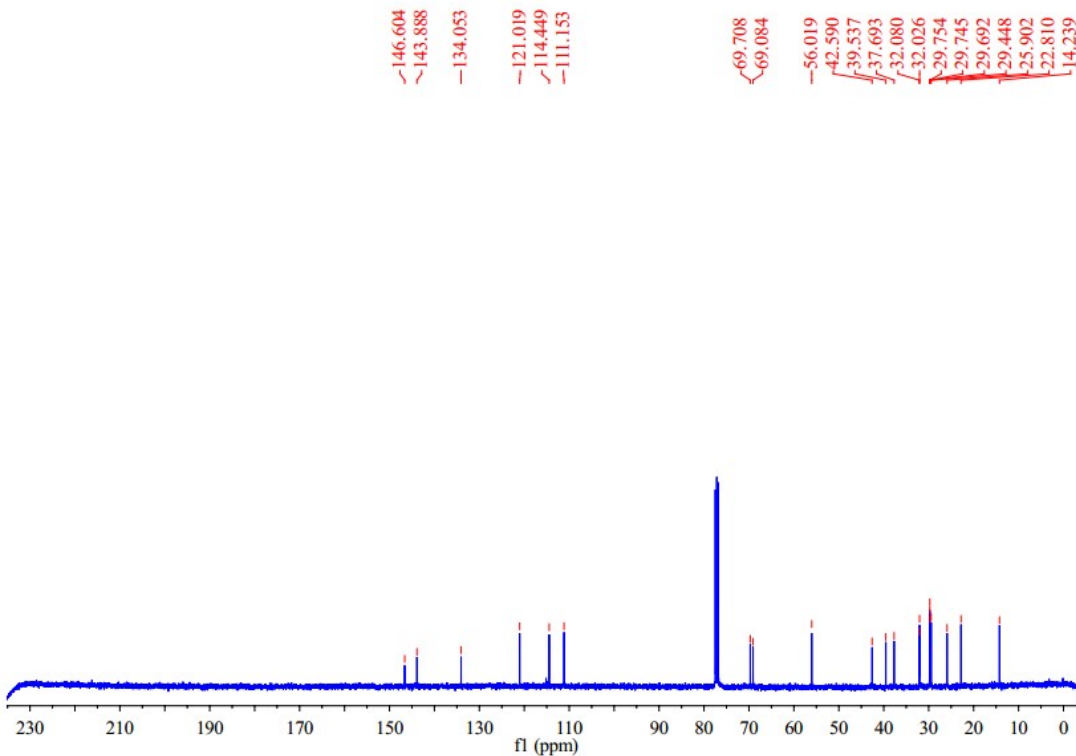

Figure S9-2.

Figure S9. The HRESIMS spectrum (S9-1) and <sup>13</sup>C-NMR spectrum (S9-2) of reference standard of (3S,5S)-[10]-gingerdiol.

**Table S1. Kinetic parameters derived for gingerols-related metabolites by HLM, DLM, MkLM, MLM, MpLM, and RLM (Mean ± SD).**

| Compound | Enzyme             | Metabolite          | Vmax<br>(pmol/min/mg) | Km (μM)      | Ksi (μM)      | Clint<br>(μL/min/mg) | Model |
|----------|--------------------|---------------------|-----------------------|--------------|---------------|----------------------|-------|
| 6G       | HLM                | M <sub>6G</sub> -1  | 123.82±3.47           | 181.30±11.30 | NA            | 0.88±0.05            | MM    |
|          |                    | M <sub>6G</sub> -5  | 432.80±7.02           | 149.10±5.82  | NA            | 2.90±0.12            | MM    |
|          | DLM                | M <sub>6G</sub> -5  | 343.4±18.48           | 138.9±17.7   | NA            | 2.47±0.34            | MM    |
|          | MkLM               | M <sub>6G</sub> -5  | 415.2±12.88           | 47.88±5.008  | NA            | 8.71±0.95            | MM    |
|          |                    | M <sub>6G</sub> -8  | 297.8±11.30           | 18.45±2.583  | NA            | 22.13±4.3            | MM    |
|          | MLM                | M <sub>6G</sub> -3  | 131.3±8.753           | 118.2±15.21  | NA            | 1.11±0.15            | MM    |
|          |                    | M <sub>6G</sub> -5  | 1558±84.13            | 188.7±21.73  | NA            | 8.24±1.05            | MM    |
|          | MpLM               | M <sub>6G</sub> -5  | 97.04±4.497           | 173.4±17.83  | NA            | 0.58±0.08            | MM    |
|          | RLM                | M <sub>6G</sub> -1  | 254.82±7.72           | 180.90±12.21 | NA            | 1.41±0.10            | MM    |
|          |                    | M <sub>6G</sub> -4  | 1280.00±181.70        | 170.80±28.48 | 80.57±9.48    | 7.49±1.50            | SI    |
|          | M <sub>6G</sub> -5 | 531.50±54.44        | 409.90±88.52          | NA           | 1.30±0.25     | MM                   |       |
| 8G       | HLM                | M <sub>8G</sub> -1  | 81.41±1.85            | 8.78±0.88    | 820.3±88.35   | 9.08±0.92            | SI    |
|          |                    | M <sub>8G</sub> -2  | 390.40±4.88           | 1.93±0.005   | 805.2±28.80   | 202.00±13.11         | SI    |
|          |                    | M <sub>8G</sub> -6  | 848.90±38.23          | 109.00±13.39 | NA            | 7.79±1.01            | MM    |
|          | DLM                | M <sub>8G</sub> -2  | 121.8±8.199           | 98.93±20.05  | NA            | 1.23±0.28            | MM    |
|          |                    | M <sub>8G</sub> -6  | 398.2±7.538           | 94.85±5.458  | NA            | 4.21±0.28            | MM    |
|          |                    | M <sub>8G</sub> -7  | 95.03±4.818           | 88.05±2.059  | NA            | 1.44±0.11            | MM    |
|          | MkLM               | M <sub>8G</sub> -2  | 38.39±2.527           | 80.01±13.83  | NA            | 0.84±0.15            | MM    |
|          |                    | M <sub>8G</sub> -6  | 284.2±12.42           | 18.18±3.912  | NA            | 18.35±4.05           | MM    |
|          | MLM                | M <sub>8G</sub> -4  | 23.5±0.484            | 25.21±2.102  | NA            | 0.93±0.08            | MM    |
|          |                    | M <sub>8G</sub> -6  | 470.4±51.45           | 72.59±12.89  | 252.8±48.2    | 8.48±1.33            | SI    |
|          | MpLM               | M <sub>8G</sub> -2  | 182.1±14.83           | 243.4±14.83  | NA            | 0.87±0.15            | MM    |
|          |                    | M <sub>8G</sub> -6  | 437.8±28.88           | 102.4±20.08  | NA            | 4.27±0.88            | MM    |
|          | RLM                | M <sub>8G</sub> -1  | 98.07±8.53            | 25.88±3.88   | 433.10±80.09  | 3.72±0.81            | SI    |
|          | M <sub>8G</sub> -2 | 841.20±17.13        | 8.53±0.45             | 225.9±17.09  | 98.19±7.22    | SI                   |       |
|          | M <sub>8G</sub> -6 | 103±13.42           | 249.5±82.7            | NA           | 0.41±0.12     | MM                   |       |
| 10G      | HLM                | M <sub>10G</sub> -1 | 88.42±8.47            | 29.82±8.08   | 73.83±14.08   | 2.24±0.54            | SI    |
|          |                    | M <sub>10G</sub> -2 | 348.10±11.83          | 5.27±0.898   | 897.50±101.50 | 88.04±9.02           | SI    |
|          |                    | M <sub>10G</sub> -4 | 1957.00±233.90        | 138.70±23.38 | 233.90±47.12  | 14.11±2.91           | SI    |
|          | DLM                | M <sub>10G</sub> -2 | 157.0±14.74           | 137.7±23.3   | NA            | 1.14±0.22            | MM    |
|          |                    | M <sub>10G</sub> -4 | 225.1±17.34           | 148.9±20.17  | NA            | 1.51±0.23            | MM    |
|          | MkLM               | M <sub>10G</sub> -1 | 95.15±5.87            | 107.7±18.84  | NA            | 0.88±0.15            | MM    |
|          |                    | M <sub>10G</sub> -4 | 1074±150.9            | 294.5±88.19  | NA            | 3.85±0.98            | MM    |
|          | MLM                | M <sub>10G</sub> -1 | 88.27±4.27            | 33.98±8.20   | NA            | 2.80±0.49            | MM    |
|          |                    | M <sub>10G</sub> -2 | 24.85±1.00            | 9.72±1.83    | NA            | 2.54±0.49            | MM    |
|          |                    | M <sub>10G</sub> -4 | 1022±83.82            | 88.89±14.97  | NA            | 11.78±2.243          | MM    |

---

|      |                     |             |             |              |             |    |
|------|---------------------|-------------|-------------|--------------|-------------|----|
| MpLM | M <sub>10G</sub> -1 | 99.54±3.535 | 28.09±3.994 | NA           | 3.54±0.52   | MM |
|      | M <sub>10G</sub> -2 | 204.9±3.885 | 28.07±2.01  | NA           | 7.88±0.82   | MM |
|      | M <sub>10G</sub> -3 | 830.8±83.58 | 1239±155.4  | NA           | 0.51±0.08   | MM |
|      | M <sub>10G</sub> -4 | 1292±82.78  | 228.4±29    | NA           | 5.71±0.82   | MM |
| RLM  | M <sub>10G</sub> -1 | 189.50±7.81 | 7.04±1.083  | 433.10±80.09 | 24.07±3.71  | SI |
|      | M <sub>10G</sub> -2 | 250.00±8.53 | 8.48±0.811  | 828.40±35.00 | 38.58± 5.00 | SI |
|      | M <sub>10G</sub> -4 | 78.33±3.35  | 39.43±8.82  | NA           | 1.94±0.35   | MM |

---

**Table S2. Kinetic parameters derived for gingerols-related metabolites by expressed CYP enzymes (Mean±SD).**

| Compound | Enzyme | Metabolite          | Vmax                | Km (μM)      | Ksi (μM)     | Clint        | Mode      |
|----------|--------|---------------------|---------------------|--------------|--------------|--------------|-----------|
| d        |        | s                   | (pmol/min/mg)       |              |              | (μL/min/mg)  | l         |
| 8G       | CYP1A2 | M <sub>6G</sub> -1  | 79.78 ±2.98         | 212.83±18.5  | NA           | 0.38±0.03    | MM        |
|          |        | M <sub>6G</sub> -3  | 288.40±7.93         | 135.80±9.43  | NA           | 2.12±0.18    | MM        |
|          | CYP2C1 | M <sub>6G</sub> -1  | 287.55±11.38        | 30.21±2.84   | 549.21±88.57 | 8.85±0.88    | SI        |
|          |        | M <sub>6G</sub> -4  | 3308.40±129.0       | 52.22±73.84  | 558.80±80.74 | 83.31±5.08   | SI        |
| 8G       | CYP1A2 | M <sub>8G</sub> -1  | 142.00±11.48        | 28.27±4.98   | 495.20±109.8 | 5.02±0.97    | SI        |
|          |        | M <sub>8G</sub> -5  | 284.30±27.51        | 100.80±15.5  | 258.80±47.91 | 2.83±0.49    | SI        |
|          | CYP2C1 | M <sub>8G</sub> -1  | 398.90±19.88        | 8.71±0.80    | 131.50±15.50 | 59.19±7.89   | SI        |
|          |        | M <sub>8G</sub> -5  | 588.00±81.30        | 13.00±3.17   | 59.44±14.27  | 45.20±12.8   | SI        |
|          | CYP2E1 | M <sub>8G</sub> -1  | 340.50±48.83        | 121.30±25.1  | 389.90±109.8 | 2.81±0.70    | SI        |
|          | CYP2D6 | M <sub>8G</sub> -4  | 5.23±0.25           | 14.52±3.78   | NA           | 0.38±0.09    | MM        |
|          |        | M <sub>8G</sub> -8  | 14.92±0.87          | 3.48±1.12    | 3135±2078    | 4.29±1.4     | SI        |
|          | 10G    | CYP1A2              | M <sub>10G</sub> -2 | 120.90±23.58 | 77.84±23.77  | 129.20±33.70 | 1.58±0.57 |
| CYP2B8   |        | M <sub>10G</sub> -2 | 82.81±5.94          | 25.35±4.81   | 110.80±17.74 | 2.48±0.51    | SI        |
|          |        | M <sub>10G</sub> -4 | 47.99±7.42          | 38.8±11.09   | 389.3±142    | 1.31±0.45    | SI        |
| CYP2C1   |        | M <sub>10G</sub> -1 | 887.70±237.80       | 9.90±4.54    | 5.48±2.48    | 87.48±39.1   | SI        |
| CYP2E1   |        | M <sub>10G</sub> -1 | 719.50±74.71        | 73.55±12.02  | 170.80±83.59 | 9.83±1.89    | SI        |
|          |        | M <sub>10G</sub> -2 | 112.90±14.44        | 20.03±5.23   | 102.90±22.49 | 5.84±1.84    | SI        |
